# Supplementary material
Source: PubMed Central journal article supplement (PMC2796930)
Supplement: supp_137.1.33_DEV038026TableS1.pdf [file supp_137.1.33_DEV038026TableS1.pdf]

**Table S1. RNA in situ hybridisation probes**

| Probe          | Restriction site/polymerase | Reference/imaGene ID   |
|----------------|-----------------------------|------------------------|
| <i>cx43α1</i>  | <i>EcoRI/Sp6</i>            | IMAGp998L0210947Q      |
| <i>ephA4</i>   | <i>BamHI/T7</i>             | Xu et al., 1995        |
| <i>erm</i>     | <i>NotI/T7</i>              | Munchberg et al., 1999 |
| <i>fabp7a</i>  | <i>EcoRI/Sp6</i>            | IMAGp998A0111841Q1     |
| <i>glula</i>   | <i>EcoRI/T7</i>             | IRBOP991B083D2         |
| <i>kaede</i>   | <i>BamHI/T7</i>             | Ando et al., 2002      |
| <i>nkx2.2a</i> | <i>BamHI/T7</i>             | Barth and Wilson, 1995 |
| <i>ngn1</i>    | <i>XhoI/T7</i>              | Blader et al., 1997    |
| <i>olig2</i>   | <i>Sall/Sp6</i>             | IMAGp998D0610945Q      |
| <i>pax3</i>    | <i>NotI/T7</i>              | Seo et al., 1998       |
| <i>pax6a</i>   | <i>NotI/T7</i>              | Krauss et al., 1991    |
| <i>sox9a</i>   | <i>HindIII/T3</i>           | IRBOP991A1167D         |
| <i>sox9b</i>   | <i>EcoRI/T7</i>             | IMAGp998A2314316Q      |
| <i>sox10</i>   | <i>Sall/T7</i>              | Dutton et al., 2001    |

## References

- Ando, R., Hama, H., Yamamoto-Hino, M., Mizuno, H. and Miyawaki, A.** (2002). An optical marker based on the UV-induced green-to-red photoconversion of a fluorescent protein. *Proc. Natl. Acad. Sci. USA* **99**, 12651-12656.
- Barth, K. A. and Wilson, S. W.** (1995). Expression of zebrafish *nk2.2* is influenced by sonic hedgehog/vertebrate hedgehog-1 and demarcates a zone of neuronal differentiation in the embryonic forebrain. *Development* **121**, 1755-1768.
- Blader, P., Fischer, N., Gradwohl, G., Guillemot, F. and Strahle, U.** (1997). The activity of neurogenin1 is controlled by local cues in the zebrafish embryo. *Development* **124**, 4557-4569.
- Dutton, K. A., Pauliny, A., Lopes, S. S., Elworthy, S., Carney, T. J., Rauch, J., Geisler, R., Haffter, P. and Kelsh, R. N.** (2001). Zebrafish *colourless* encodes *sox10* and specifies non-ectomesenchymal neural crest fates. *Development* **128**, 4113-4125.
- Krauss, S., Johansen, T., Korzh, V., Moens, U., Ericson, J. U. and Fjose, A.** (1991). Zebrafish *pax[zf-a]*: a paired box-containing gene expressed in the neural tube. *EMBO J.* **10**, 3609-3619.
- Munchberg, S. R., Ober, E. A. and Steinbeisser, H.** (1999). Expression of the Ets transcription factors *erm* and *pea3* in early zebrafish development. *Mech. Dev.* **88**, 233-236.
- Seo, H. C., Saetre, B. O., Havik, B., Ellingsen, S. and Fjose, A.** (1998). The zebrafish *Pax3* and *Pax7* homologues are highly conserved, encode multiple isoforms and show dynamic segment-like expression in the developing brain. *Mech. Dev.* **70**, 49-63.
- Xu, Q., Alldus, G., Holder, N. and Wilkinson, D. G.** (1995). Expression of truncated *Sek-1* receptor tyrosine kinase disrupts the segmental restriction of gene expression in the *Xenopus* and zebrafish hindbrain. *Development* **121**, 4005-4016.
